# Supplementary material for: Perinatal Bisphenol A Exposure and Reprogramming of Imprinted Gene Expression in the Adult Mouse Brain
Source: PubMed Central journal article supplement (PMC6796247; doi:10.3389/fgene.2019.00951), 2019-10-10
Supplement: Presentation_1.pdf [file Presentation_1.pdf]

**Supplementary Table 1: qRT-PCR primer sequences**

| Gene           | Forward                    | Reverse                     |
|----------------|----------------------------|-----------------------------|
| <i>Kcnq1</i>   | CATCACCCATGTGTCACAGC       | CCGTGCTTGCTGGAATTTCT        |
| <i>Pde10a</i>  | CGGGACATCGAGCTATTCCA       | ACTGCATGCTTCCAGTTGTG        |
| <i>Ppp1r9a</i> | GCGGGCCTATTCTTCCTAGT       | GCTGCTTGAAGCTTGGTCTT        |
| <i>Dnmt1</i>   | AGAGACGAGGATGAGAGGGA       | GGTGAGTTGATCTTCGGGAT        |
| <i>Tet1</i>    | ACCGTGGTGTGTACGTTGAT       | G TTCATCCTCGGGACAATTT       |
| <i>Tet2</i>    | GACTGCTGTTTGGGTCTGAA       | GGTGACCACCACTGTACTGC        |
| <i>β-actin</i> | GCTCCTTCGTTGCCGGTCCA       | ATACAGCCCGGGGAGCATCG        |
| <i>18S</i>     | GCCCTGTAATTGGAATGAGTCCACTT | GTCCCAAGATCCAACACTACGAGCTTT |
| <i>Gapdh</i>   | GCCTGCTTCACCACCTTCTT       | CATGGCCTTCCGTGTTCTTA        |

**Supplementary Table 2: Primer sequences for *Kcnq1* pyrosequencing**

| Primer      | Sequence                      |
|-------------|-------------------------------|
| Forward PCR | TGGGAGTTGAGTATATTTAGATAGGTA   |
| Reverse PCR | AAACCATTTAACAAAACTATCCCTCAACA |
| Sequencing  | AAAACACTATCCCTCAACAA          |

**Supplementary Table 3: *Tet1* Summary Statistics**

|                     |         | N | Mean (sd)      | Median (range)         | Mann-Whitney test<br>( $\alpha=0.05$ ) |
|---------------------|---------|---|----------------|------------------------|----------------------------------------|
| <b>Right Cortex</b> | Control | 6 | 16.319 (1.39)  | 15.951 (15.252-19.055) | 0.94                                   |
|                     | BPA     | 6 | 15.759 (0.772) | 15.759 (14.498-16.389) |                                        |
| <b>Midbrain</b>     | Control | 6 | 15.824 (1.286) | 16.037 (13.902-17.229) | 0.31                                   |
|                     | BPA     | 6 | 15.17 (0.796)  | 15.357 (13.803-15.912) |                                        |

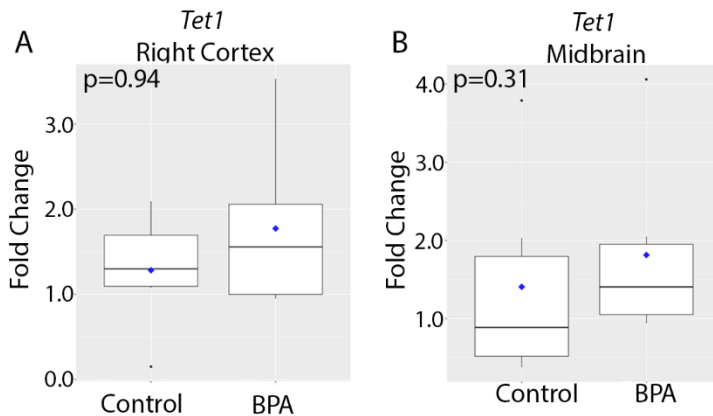

**Supplementary Figure 1: *Tet1* expression in the brain at 10 months of age in animals exposed to control vs. BPA.** Box plots depicting qRT-PCR data for *Tet1* in the right cortex (A) and midbrain (B). Data were analyzed using a two-sided non-parametric Wilcoxon test.

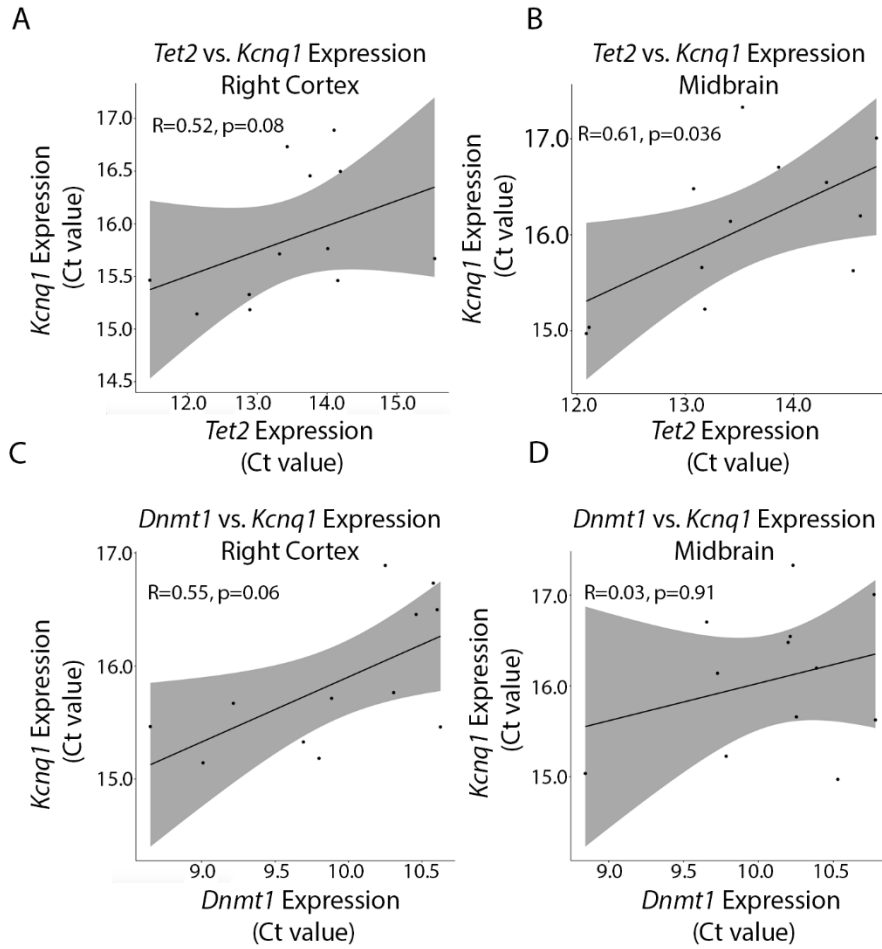

**Supplementary Figure 2:** Correlations between expression of *Tet2* (A-B) and *Dnmt1* (C-D) and *Kcnq1* expression in the right cortex (A,C) and midbrain (B,D). Correlation analyses were assessed with a Spearman Correlation Test using the *ggpubr* package in R. Ct values have been normalized to the average Ct value of the three housekeeping genes.

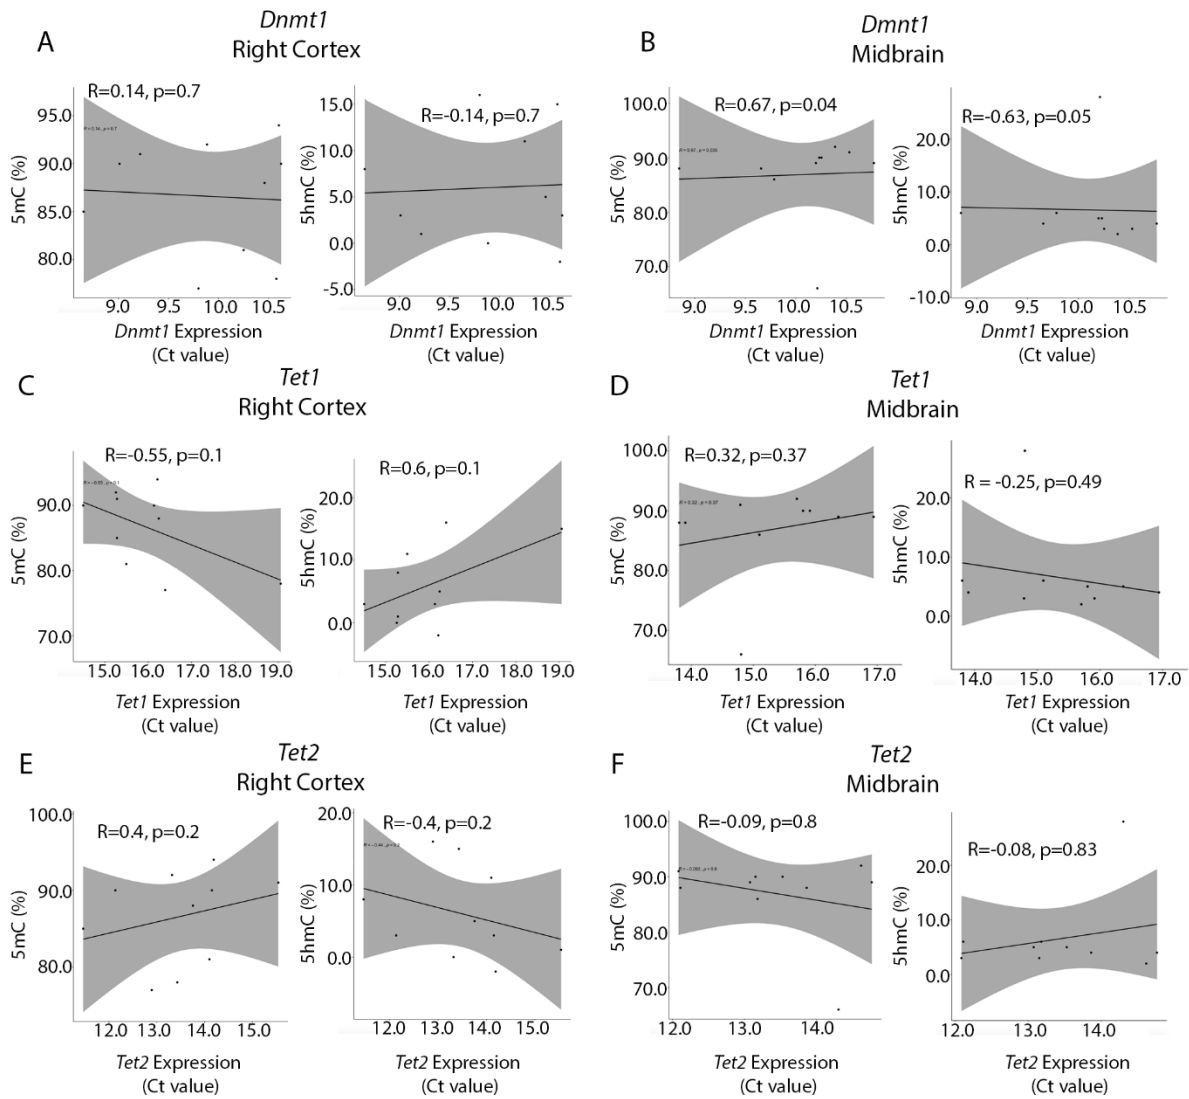

**Supplementary Figure 3:** Correlations between expression of *Dnmt1* (A-B), *Tet1* (C-D), *Tet2* (E-F) and levels of 5mC (left) and 5hmC (right). Correlation analyses were assessed with a Spearman Correlation Test using the `ggpubr` package in R. Ct values have been normalized to the average Ct value of the three housekeeping genes.

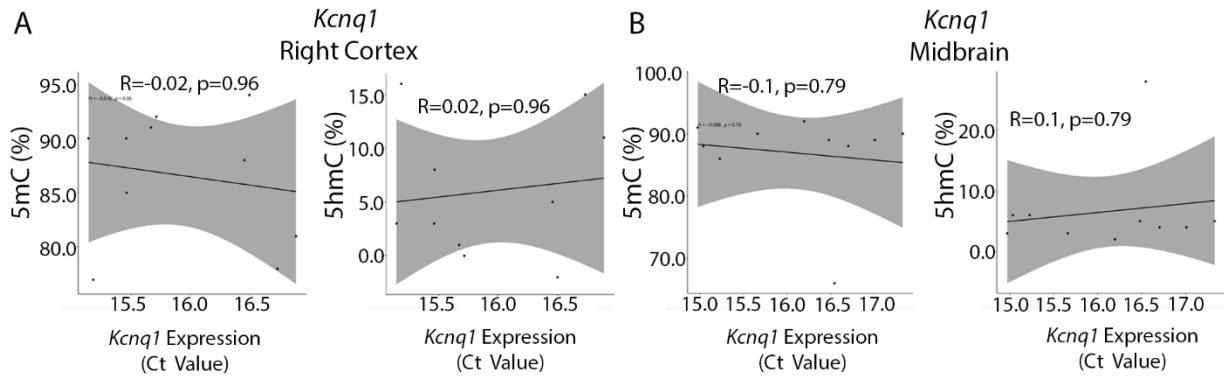

**Supplementary Figure 4:** Correlations between expression of *Kcnq1* and levels of 5mC (left) and 5hmC (right) in the right cortex (A) and midbrain (B). Correlation analyses were assessed with a Spearman Correlation Test using the ggpubr package in R. Ct values have been normalized to the average Ct value of the three housekeeping genes.
